# Supplementary material
Source: PubMed Central journal article supplement (PMC4978156)
Supplement: BPH-173-2573-s002.pdf [file BPH-173-2573-s002.pdf]

## **Supporting information**

### **Effects of xanthine oxidase inhibition with febuxostat on the development of nephropathy in experimental Type 2 diabetes.**

Radko Komers, Bei Xu, Jennifer Schneider, Terry T. Oyama.

### **Supplemental Figure 1. Effect of FBX, ENL, and their combination on systolic blood pressure.**

Group abbreviations: ZL-VE, Zucker lean-vehicle; ZO-VE, Zucker obese-vehicle; ZO-FBX, Zucker obese-febuxostat; ZO-FBXlate, Zucker obese-late FBX treatment; ZO-ENL, Zucker obese-enalapril; ZO-FBX+ENL, Zucker obese-febuxostat+enalapril.

<sup>a</sup>p<0.05 vs. ZL-VE; <sup>b</sup>p<0.05 vs. ZO-VE; <sup>c</sup>p<0.05 vs. ZO-FBX and/or ZO-FBXlate;

<sup>d</sup>p<0.05 vs. ZO-ENL.
