# Supplementary material
Source: PubMed Central journal article supplement (PMC4978156)

Figure 1

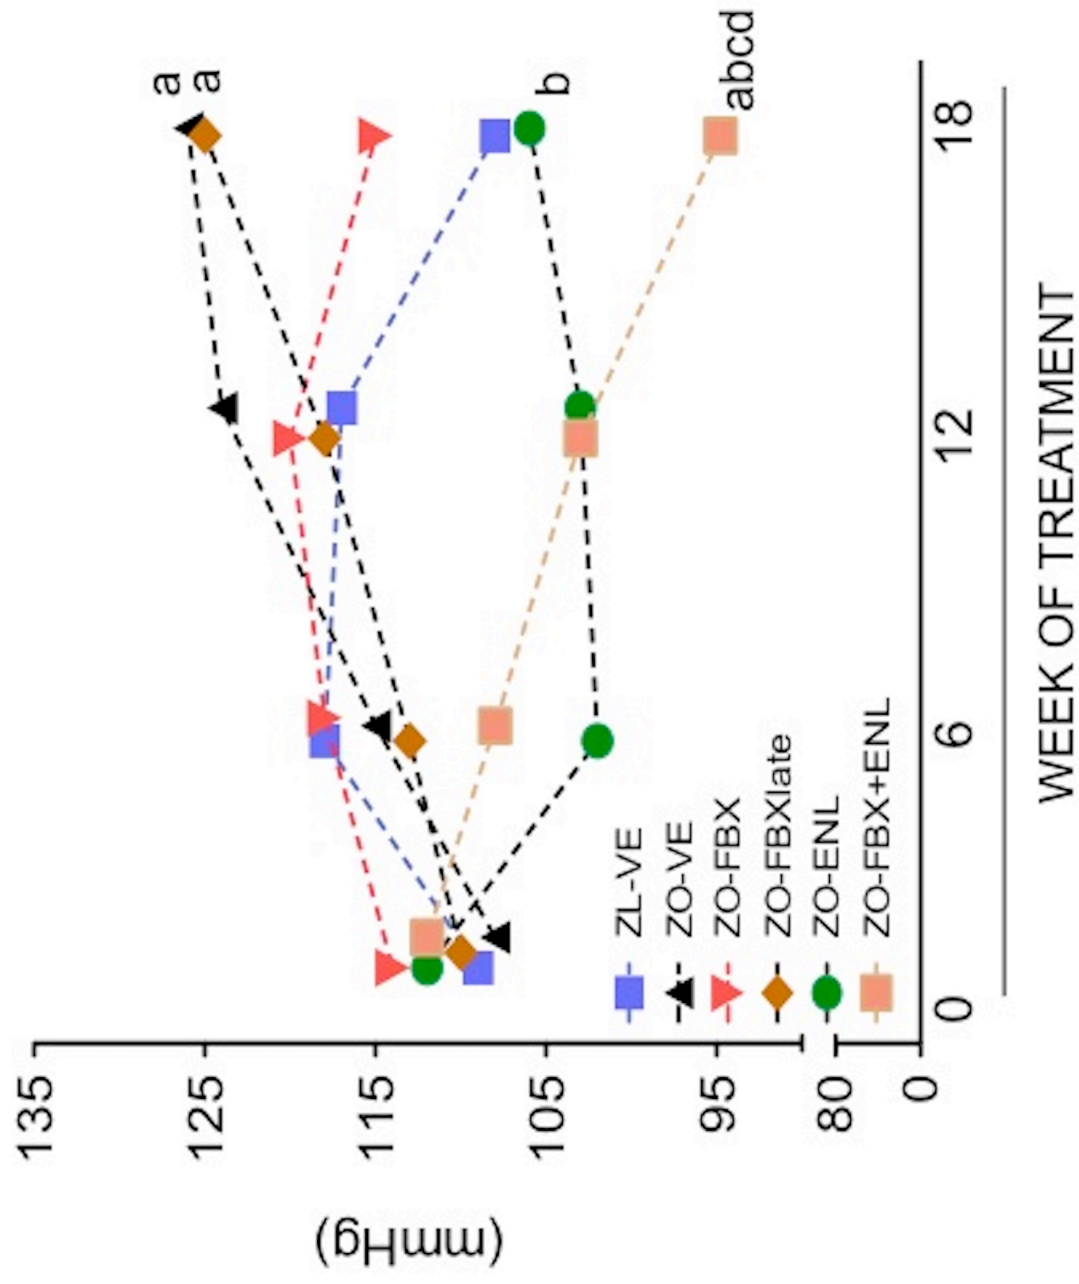

Supplement: BPH-173-2573-s001.pdf [file BPH-173-2573-s001.pdf]
